# Supplementary material for: Identification of Viruses Infecting Phalaenopsis Orchids Using Nanopore Sequencing and Development of an RT-RPA-CRISPR/Cas12a for Rapid Visual Detection of Nerine Latent Virus
Source: MDPI journal article supplement (doi:10.3390/ijms25052666), 2024-02-25
Supplement: s1 [file s1]

**Supplementary Table S1.** Information on primer sets used in this study

| Assay         | Name           | Sequence 5'-3'                                                          | Amplicon size | References |
|---------------|----------------|-------------------------------------------------------------------------|---------------|------------|
| RT-RPA        | NeLV-F1        | CCTTCCTCGACCGCAGTGGCGACTTGCACA                                          | 105 bp        | This study |
|               | NeLV-R1        | CCAAACTATTGGTGCTATTGATTCAGGCGG                                          |               |            |
| CRISPR/Cas12a | NeLV-crRNA     | CCAATCCTTGCGAATTTAGCTATCTACACTTAGTAGAAATTACCCTAT<br>AGTGAGTCGTATTAATTTT | 716 bp        | This study |
|               | ncrRNA-1       | UAAUUUCUACUAAGUGUAGAUUCAGGUAAGUUAGGAUGCUUCCC                            |               |            |
|               | ncrRNA-2       | UAAUUUCUACUAAGUGUAGAUGGGUAGAACUAACGAUGCCCUUU                            |               |            |
|               | ncrRNA-3       | UAAUUUCUACUAAGUGUAGAUUCAGGCAAUCCACUUCAACA                               |               |            |
|               | T7-crRNA-F     | GAAATTAATACGACTCACTATAGGG                                               |               | [1]        |
|               | ssDNA Reporter | 6-FAM-TTATTCCCCC-BHQ-1                                                  |               | [2]        |
| RT-PCR        | CymMVK-F       | ACAATAATTTGAAATAATCATGGGA                                               | 612 bp        | [3]        |
|               | CymMVK-R       | AAAACCACACGCCTTATTAAGTTTG                                               |               |            |
|               | NeLV-F         | CCTATGGATGAGATTAGRCCG                                                   | 528 bp        | [4]        |
|               | NeLV-R         | GCAACCATACAGCCCACC                                                      |               |            |
|               | ORSVK-F        | ACGCACAATCTGATTCGTATTGAA                                                | 356 bp        | [3]        |
|               | ORSVK-R        | TATCAACGTTATTTTCCTAAATAT                                                |               |            |
|               | Orchid- ACT-F1 | ACAGGTATTGTGCTTGATTCTGG                                                 | 356 bp        | [5]        |
|               | Phal-ACT4-R    | ATCATGGATGGTTGGAAAAGGAC                                                 |               |            |

## References

1. Srivastava, A.; Gupta, T.; Srivastava, S.; Dhir, S.; Kumar, P.; Singhal, T.; Rani, A.; Rishi, N. Development of a new Collateral Cleavage-independent CRISPR/Cas12a based easy detection system for plant viruses. *J. Virol. Methods* **2022**, *300*, 114432. <https://doi.org/10.1016/j.jviromet.2021.114432>
2. Lee, S.; Nam, D.; Park, J.S.; Kim, S.; Lee, E.S.; Cha, B.S.; Park, K.S. Highly efficient DNA reporter for CRISPR/Cas12a-based specific and sensitive biosensor. *Biochip J.* **2022**, *16*, 463-470. <https://doi.org/10.1007/s13206-022-00081-0>
3. Chung, B.-N.; Yoon, J.-Y.; Kim, M.-S. Viral infection of tissue cultured orchids and evaluation of damages. *Plant Pathol. J.* **2010**, *26*, 194-197. <https://doi.org/10.5423/PPJ.2010.26.2.194>
4. Heo, E.S.; Choi, S.H. Nerine latent virus diagnosed in *Hippeastrum* bulbs in Korea. *Hortic. Sci. Technol.* **2021**, *39*, 507-513. <https://doi.org/10.7235/HORT.20210045>
5. Jeong, D.-S.; Hong, K.H.; Park, K.-I. Detection of Cymbidium mosaic virus and Odontoglossum ringspot virus in Phalaenopsis in Korea. *Hortic. Sci. Technol.* **2021**, *39*, 514-520. <https://doi.org/10.7235/HORT.20210046>
