# Supplementary figures and images for: Identification of Viruses Infecting Phalaenopsis Orchids Using Nanopore Sequencing and Development of an RT-RPA-CRISPR/Cas12a for Rapid Visual Detection of Nerine Latent Virus
Source: MDPI journal article supplement (doi:10.3390/ijms25052666), 2024-02-25

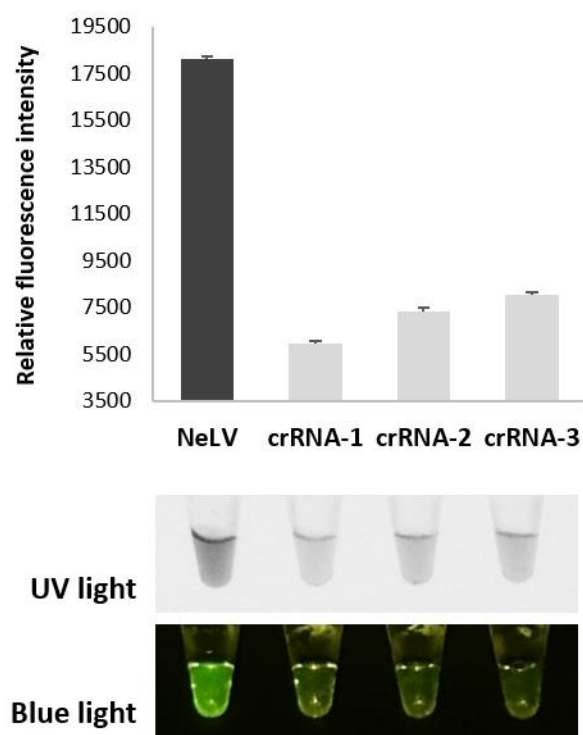

Figure S1: Confirmation of specificity with nonsense crRNA control

Supplement: s1 [file s1]
